# Supplementary material
Source: ML conference proceedings conference paper supplement (https://aclanthology.org/2021.naacl-main.14)
Supplement: OptionalSupplementaryCode [file simple_dod.pdf › ptakopet-master/meta/logo/posters/simple_dod.pdf]

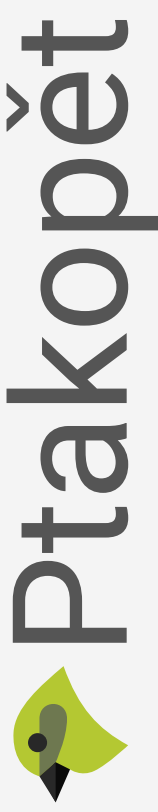

Source language: Czech ▼

Jak jinak můžeme pracovat s automatickým překladem?

Target language: German ▼

Wie sollen Sie sonst mit einer automatischen Übersetzung eingeben?

Backward translation:

Jak jinak byste zadal automatický překlad?

Translator backend:

Quality estimator backend:

Alignment backend:

Tokenization backend:

About Ptakopět

ÚFAL Translation Dev ▼

OpenKiwi ▼

fast\_align ▼

Moses ▼

Join study
