# Supplementary material
Source: ML conference proceedings conference paper supplement (https://aclanthology.org/2021.naacl-main.14)
Supplement: OptionalSupplementaryCode [file word_alignment.pdf › img/word_alignment.pdf]

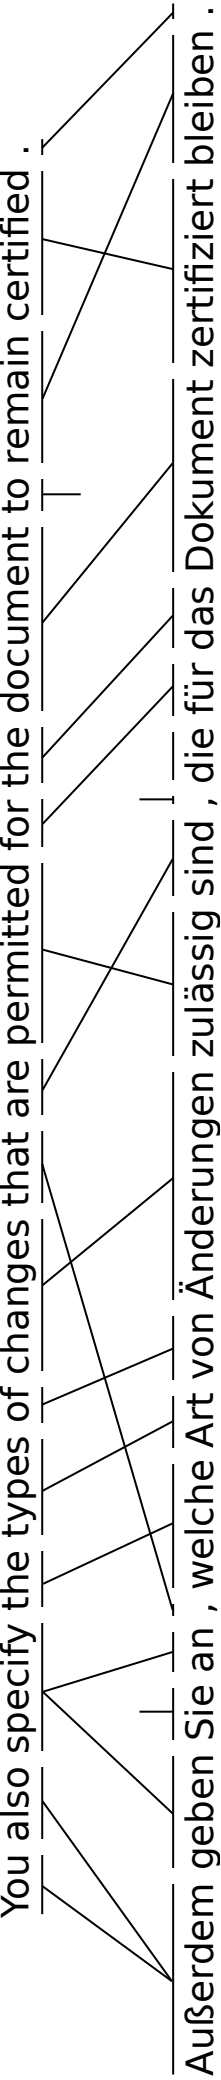

You also specify the types of changes that are permitted for the document to remain certified .

Außerdem geben Sie an , welche Art von Änderungen zulässig sind , die für das Dokument zertifiziert bleiben .
